# Supplementary material for: Anti-tubercular Activity of Pyrazinamide is Independent of trans-Translation and RpsA
Source: PubMed Central journal article supplement (PMC5522395; doi:10.1038/s41598-017-06415-5), 2017-07-21
Supplement: 41598_2017_6415_MOESM1_ESM.pdf [file 41598_2017_6415_MOESM1_ESM.pdf]

# **Anti-tubercular Activity of Pyrazinamide is Independent of *trans*- Translation and RpsA**

Nicholas A. Dillon<sup>1†</sup>, Nicholas D. Peterson<sup>1†</sup>, Heather A. Feaga<sup>2</sup>, Kenneth C. Keiler<sup>2</sup>, and Anthony D. Baughn<sup>1\*</sup>

<sup>1</sup>*Department of Microbiology and Immunology, University of Minnesota Medical School, Minneapolis, MN 55455.* <sup>2</sup>*Department of Biochemistry and Molecular Biology, The Pennsylvania State University, University Park, PA 16802.*

\*Correspondence to: Anthony D. Baughn, [abaughn@umn.edu](mailto:abaughn@umn.edu).

†Contributed equally to this work.

**Table S1.** Oligonucleotide primers used in this study.

| Name of oligonucleotide     | Sequence 5' to 3'                           |
|-----------------------------|---------------------------------------------|
| MtbSsrAF                    | GAAATTAATACGACTCACTATAGGGGCTGAACGGTTTCGACTT |
| MtbSsrAR                    | TGGTGGAGCTGCCGGGAATC                        |
| TB_SmpB_F                   | CGCGGCAGCCATATGGTGTCCAAGTCGTCGCGTG          |
| TB_SmpB_R                   | CTCGAGTGCGGCCGCAAGCTTCAGGTCATGCCCTTAGCGC    |
| Anti-SsrA                   | ATGTGAATCGGCGCTTATT                         |
| <i>rpsA</i> _5'_F           | TTAATTAAACATCGGCAAGGAGATCGAG                |
| <i>rpsA</i> _5'_R           | GCTAGCTCAAGCGCTGCCGGCGAGTTTTTCCC            |
| <i>rpsA</i> _3'_F           | CCATGGGCCGGCAGCGCTTGATCTTG                  |
| <i>rpsA</i> _3'_R           | CATATGTCGTTTCAGGGACGCCAGTG                  |
| <i>rpsA</i> $\Delta$ A438_F | GAGGCGGCTGGACGCGGCGCGGACGATCAGTC            |
| <i>rpsA</i> $\Delta$ A438_R | GGCGGCGAACTTCTCCATCTG                       |

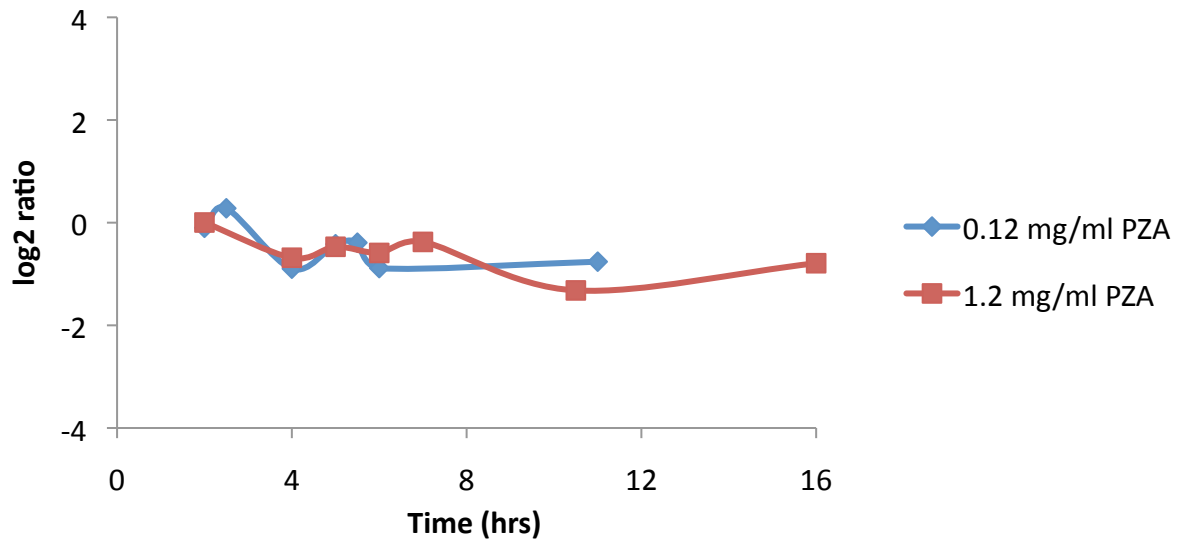

Figure S1. PZA does not impact *rpsA* expression levels in *M. tuberculosis*. Data represent microarray log<sub>2</sub> signal intensities for *rpsA* from *M. tuberculosis* cultures that were treated with 0.12 mg/ml PZA or 1.2 mg/ml PZA relative to the no PZA control from Boshoff *et al.* (2004).

Boshoff, H.I.M. *et al.* The Transcriptional Responses of *Mycobacterium tuberculosis* to Inhibitors of Metabolism: NOVEL INSIGHTS INTO DRUG MECHANISMS OF ACTION. *J Biol Chem* **279**, 40174-40184 (2004).

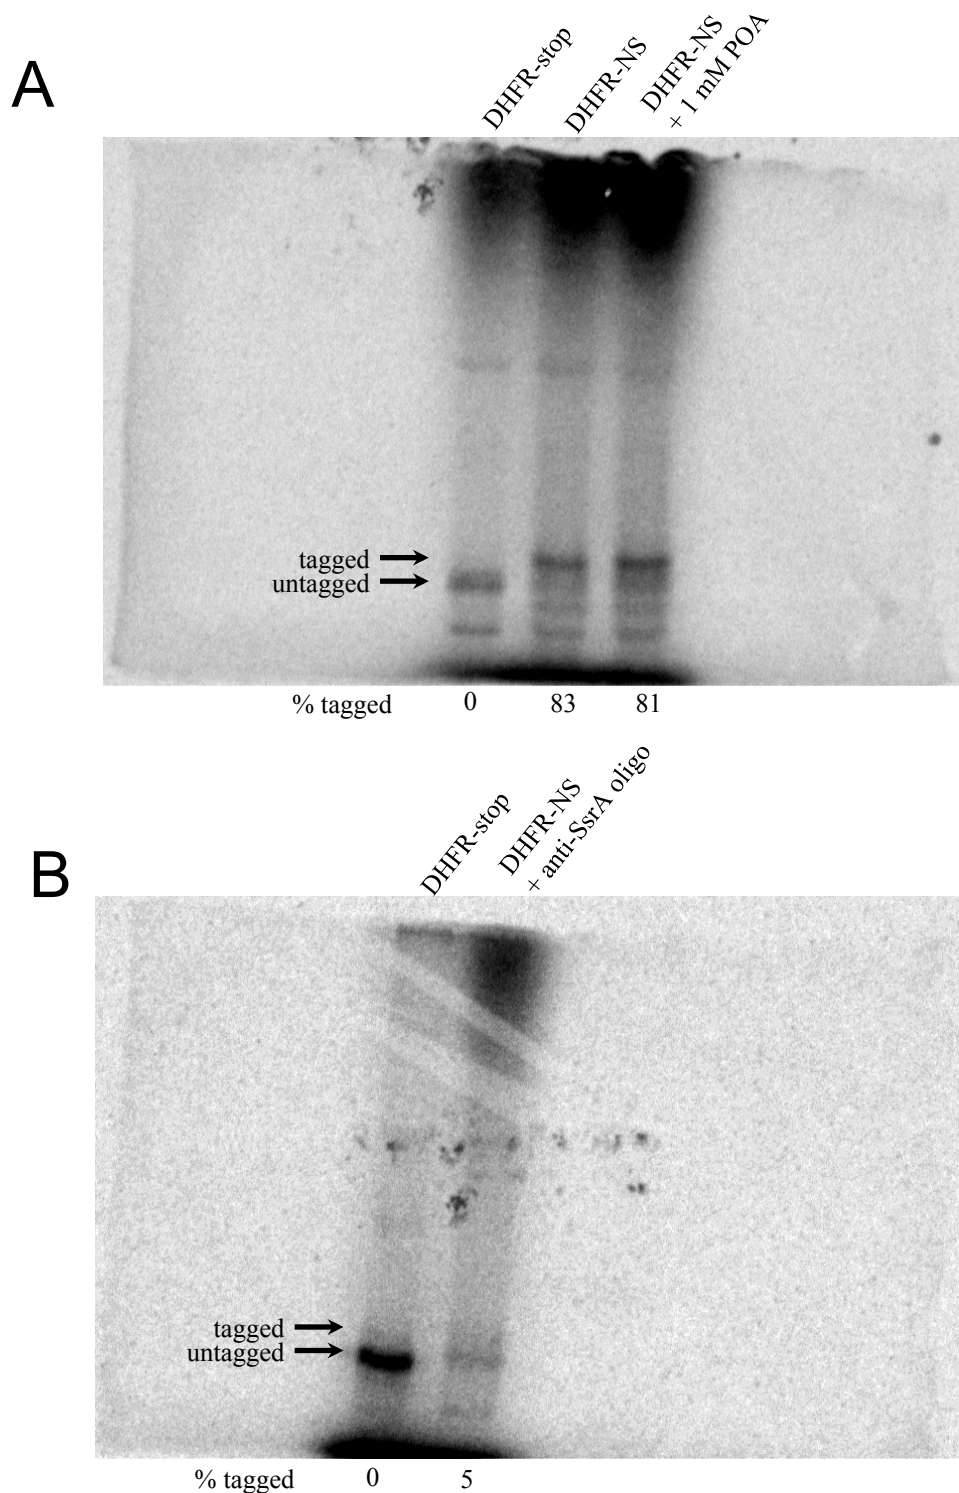

**Figure S2.** POA does not inhibit *trans*-translation *in vitro*. Original uncropped images from Figure 4. Panel A, *in vitro* translation of non-tagged protein (DHFR-stop), *trans*-translation of SsrA tagged protein from a non-stop template (DHFR-NS), *trans*-translation of DHFR-NS despite addition of 1 mM POA to the reaction mixture (DHFR-NS + 1 mM POA). Panel B, *in vitro* translation of non-tagged protein (DHFR-stop) and inhibition of *trans*-translation with 2  $\mu$ M anti-SsrA oligonucleotide (DHFR-NS + anti-SsrA oligo). *trans*-Translation reactions were carried out with 50 nM *M. tuberculosis* ribosomes, 150 nM *M. tuberculosis* tmRNA, 150 nM *M. tuberculosis* SmpB, and 640 nM template DNA. Reactions were incubated at 37 °C 3 h and analyzed by SDS-PAGE followed by phosphorimaging.
